# Supplementary material for: The Effect of Mediterranean Diet Adherence and Physical Activity Level on Weight Loss after Laparoscopic Sleeve Gastrectomy
Source: Research Square preprint supplement (doi:10.21203/rs.3.rs-7176825/v1), 2025-08-03
Supplement: Supplementary file 1 [file 610762938760435abf25199c.docx]

**Table 1. Basic characteristics of patients**

| **Variables** |  |
| --- | --- |
| **Age (years), X̄±SD** | 36.84±9.24 (Min.-Max.= 19-58) |
| **Sex, n (%)**  Females  Male | 77 (79.4)  20 (20.6) |
| **Educational status, n (%)**  Primary education  High school  University | 20 (20.6)  41 (42.3)  36 (37.1) |
| **Employment status, n (%)**  Working  Not working | 57 (58.8)  40 (41.2) |
| **Chronic disease, n (%)**  Yes  No | 21 (21.6)  76 (78.4) |
| **Distribution of Chronic Diseases*, n (%)**  Hypothyroid  Respiratory system disease  Type II Diabetes  Hypertension  Hypercholesterol  Musculoskeletal system disease  Psychiatric illness | 6 (6.2)  2 (2.1)  4 (4.1)  6 (6.2)  2 (2.1)  4 (4.1)  6 (6.2) |
| **BMI (kg/m2), X̄±SD** | 45.53±6.39 (Min.-Max.= 35.76-64.09) |
| **Weight (kg), X̄±SD** | 124.71±24.67 (Min.-Max.= 83-188) |
| **Adherence to Mediterranean diet, n (%)**  Medium-High adherence (≥ 7)  Low adherence (≤ 6) | 59 (60.8)  38 (39.2) |
| **Level physical activity, n (%)**  Inactive  Minimally active  Sufficiently active | 33 (34.0)  46 (47.4)  18 (18.6) |

**More than one option was selected. X̄±SD: Mean±Standard Deviation, BMI: Body mass index*

**Table 2. Time and interaction effects on EWL% and TWL% based on Mediterranean diet adherence**

| **Effect** | **F value** | **p value** | **Partial η²** |
| --- | --- | --- | --- |
| **EWL%** | | | |
| Main effect of time | 196.532 | <0.001 | 0.674 |
| Group | 9.830 | 0.002 | 0.094 |
| Time × group interaction (overall) | 2.889 | 0.066 | 0.030 |
| 3 → 6 months* | 360.87 | <0.001 | 0.792 |
| 6 → 12 months* | 145.27 | <0.001 | 0.605 |
| 12 → 18 months* | 0.61 | 0.437 | 0.006 |
| 18 → 24 months* | 23.01 | <0.001 | 0.195 |
| 18 → 24 months ×  group interaction | 50.087 | <0.001 | 0.345 |
| **TWL%** |  |  |  |
| Main effect of time | 209.118 | <0.001 | 0.688 |
| Group | 6.369 | 0.013 | 0.063 |
| Time × group interaction (overall) | 2.909 | 0.067 | 0.030 |
| 3 → 6 months* | 370.964 | <0.001 | 0.796 |
| 6 → 12 months* | 167.696 | <0.001 | 0.638 |
| 12 → 18 months* | 1.518 | 0.221 | 0.016 |
| 18 → 24 months* | 21.487 | <0.001 | 0.184 |
| 18 → 24 months ×  group interaction | 54.163 | <0.001 | 0.363 |

*Two-factor repeated measures ANOVA with Greenhouse-Geisser correction. *Within-subjects, η²: effect size*

**Table 3. Time and interaction effects on EWL% and TWL% based on physical activity level**

| **Effect** | **F value** | **p value** | **Partial η²** |
| --- | --- | --- | --- |
| **EWL%** | | | |
| Main effect of time | 180.478 | <0.001 | 0.658 |
| Group | 0.443 | 0.644 | 0.009 |
| Time × group interaction (overall) | 1.193 | 0.315 | 0.025 |
| 3 → 6 months* | 319.054 | <0.001 | 0.772 |
| 6 → 12 months* | 130.463 | <0.001 | 0.581 |
| 12 → 18 months* | 1.985 | 0.162 | 0.021 |
| 18 → 24 months* | 7.203 | 0.009 | 0.071 |
| **TWL%** |  |  |  |
| Main effect of time | 197.857 | <0.001 | 0.678 |
| Group | 4.505 | 0.014 | 0.087 |
| Time × group interaction (overall) | 1.684 | 0.164 | 0.035 |
| 3 → 6 months* | 332.624 | <0.001 | 0.780 |
| 6 → 12 months* | 153.653 | <0.001 | 0.620 |
| 12 → 18 months* | 3.435 | 0.067 | 0.035 |
| 18 → 24 months* | 5.885 | 0.017 | 0.059 |

*Two-factor repeated measures ANOVA with Greenhouse-Geisser correction. *Within-subjects; η², effect size*

**Table 4. The effect of adherence to the Mediterranean diet and physical activity level on weight gain at 18-24 months postoperative follow-up**

| **Features** | **Weight regain** | **Without weight regain** | **χ2** | **p value** |
| --- | --- | --- | --- | --- |
| **Mediterranean diet***  Medium-High Adherence  Low adherence | 5 (8.5)  21 (55.3) | 54 (91.5)  21 (44.7) | 23.461 | 0.000 |
| **Level physical activity****  Inactive  Minimally active  Sufficiently active | 14 (42.4)  9 (19.6)  3 (16.7) | 19 (57.6)  37 (80.4)  15 (83.3) | 6.275 | 0.043 |

*n (%), *Yates Chi-Square, **Pearson Chi-Square*
